# Supplementary material
Source: PubMed Central journal article supplement (PMC4493438)
Supplement: NIHMS639799-supplement-Supporting_Information.pdf [file NIHMS639799-supplement-Supporting_Information.pdf]

# Supporting information for “Diiron Azamonothiolates via Scission of Dithiadiazacyclooctanes by Iron Carbonyls”

## Table of contents:

|                                                                                                                                                                                 |       |
|---------------------------------------------------------------------------------------------------------------------------------------------------------------------------------|-------|
| Variable Temperature $^1\text{H}$ NMR spectra for $\text{S}_2\text{N}^{\text{Me}}_2$ in $d_8$ -THF .....                                                                        | pg 1  |
| FTIR spectra of diiron carbonyl complexes discussed in this report .....                                                                                                        | pg 1  |
| $^1\text{H}$ NMR spectrum of $\text{Fe}_2[\text{SCH}_2\text{N}(\text{CH}_3)\text{CH}_2](\text{CO})_6$ , $\mathbf{1}^{\text{Me}}$ in $\text{CD}_2\text{Cl}_2$ .....              | pg 2  |
| $^1\text{H}$ - $^1\text{H}$ gCOSY spectrum of $\mathbf{1}^{\text{Me}}$ in $\text{CD}_2\text{Cl}_2$ .....                                                                        | pg 2  |
| $^1\text{H}$ - $^{13}\text{C}$ HSQC spectrum of $\mathbf{1}^{\text{Me}}$ in $\text{CD}_2\text{Cl}_2$ .....                                                                      | pg 3  |
| Cyclic Voltammogram of $\mathbf{1}^{\text{Me}}$ .....                                                                                                                           | Pg 3  |
| Arrhenius plots for stereodynamics of $\mathbf{1}^{\text{Me}}$ .....                                                                                                            | pg 4  |
| Variable Temperature $^{13}\text{C}$ NMR spectra of $\mathbf{1}^{\text{Me}}$ in $d^8$ -toluene.....                                                                             | pg 4  |
| $^{13}\text{C}$ NMR spectra of $\mathbf{1}^{\text{Me}}$ in $d^8$ -toluene containing an internal standard.....                                                                  | pg 5  |
| Full $^{13}\text{C}$ NMR spectrum of $\mathbf{1}^{\text{Me}}$ in $d^8$ -toluene .....                                                                                           | pg 5  |
| Variable Temperature $^{13}\text{C}$ NMR spectra of $\mathbf{1}^{\text{Me}}$ in $\text{CD}_2\text{Cl}_2$ .....                                                                  | pg 6  |
| $^1\text{H}$ NMR spectrum of $\text{Fe}_2[\text{SCH}_2\text{N}(\text{CH}_3)\text{CH}_2](\text{CO})_5\text{PPh}_3$ , $\mathbf{3}^{\text{Me}}$ in $\text{CD}_2\text{Cl}_2$ .....  | pg 6  |
| $^{31}\text{P}\{^1\text{H}\}$ NMR spectrum of crystals of $\mathbf{3}^{\text{Me}}$ in $\text{CD}_2\text{Cl}_2$ .....                                                            | pg 7  |
| $^{13}\text{C}$ NMR spectrum of crystals of $\mathbf{3}^{\text{Me}}$ in $\text{CD}_2\text{Cl}_2$ .....                                                                          | pg 7  |
| $^1\text{H}$ NMR spectrum of crystals of $\mathbf{3}^{\text{Me}}$ in $\text{CD}_2\text{Cl}_2$ after isomerization.....                                                          | pg 8  |
| $^{31}\text{P}\{^1\text{H}\}$ NMR spectrum of crystals of $\mathbf{3}^{\text{Me}}$ in $\text{CD}_2\text{Cl}_2$ after isomerization .....                                        | pg 8  |
| $^1\text{H}$ NMR spectrum of $\text{Fe}_2[\text{SCH}_2\text{N}(\text{CH}_3)\text{CH}_2](\text{CO})_5\text{PMe}_3$ , $\mathbf{4}^{\text{Me}}$ in $\text{CD}_2\text{Cl}_2$ .....  | pg 9  |
| Variable Temperature $^{31}\text{P}\{^1\text{H}\}$ NMR spectra of $\mathbf{4}^{\text{Me}}$ in $d^8$ -toluene .....                                                              | pg 9  |
| Full $^{13}\text{C}$ NMR spectrum of $\mathbf{4}^{\text{Me}}$ in $d^8$ -toluene .....                                                                                           | pg 10 |
| $^{13}\text{C}$ NMR spectrum of $\mathbf{4}^{\text{Me}}$ in $d^8$ -toluene at $-60$ °C highlighting CO region .....                                                             | pg 10 |
| $^1\text{H}$ NMR spectrum of $\text{Fe}_2[\text{SCH}_2\text{N}(\text{CH}_3)\text{CH}_2](\text{CO})_4(\text{dppe})$ , $\mathbf{5}^{\text{Me}}$ in $\text{CD}_2\text{Cl}_2$ ..... | pg 11 |
| $^{31}\text{P}\{^1\text{H}\}$ NMR spectrum of $\mathbf{5}^{\text{Me}}$ in $\text{CD}_2\text{Cl}_2$ .....                                                                        | pg 11 |
| $^{13}\text{C}$ NMR spectrum of $\mathbf{5}^{\text{Me}}$ in $\text{CD}_2\text{Cl}_2$ .....                                                                                      | pg 12 |

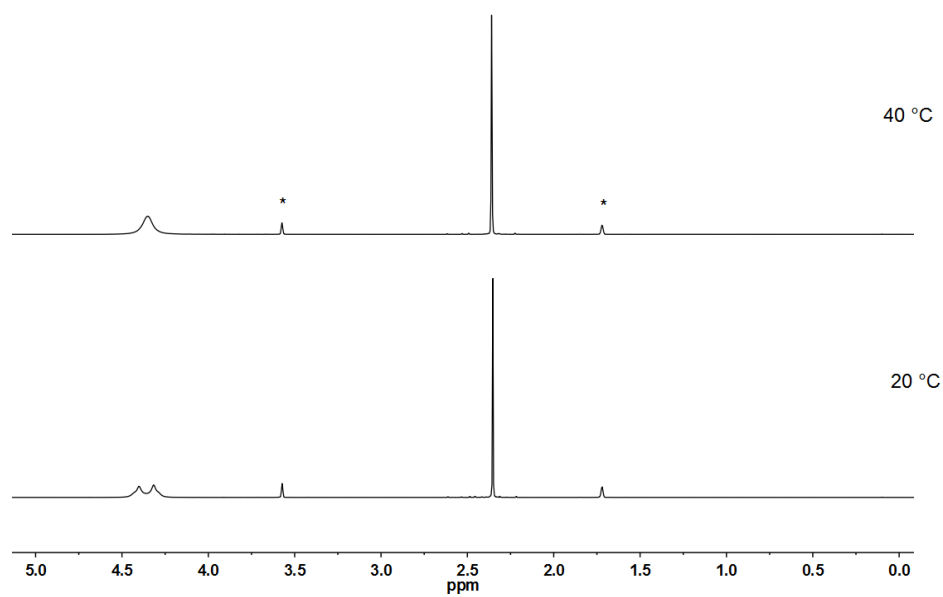

**Figure S1:**  $^1\text{H}$  NMR spectra (500 MHz,  $d_8$ -THF) of  $\text{S}_2\text{N}^{\text{Me}}_2$  at two temperatures. \* Residual solvent.  $\delta$  2.44 (s, 6H,  $\text{NCH}_3$ ), 4.24 (d, 4H,  $\text{NCH}_2\text{S}$ ), 4.52 (d, 4H,  $\text{NCH}_2\text{S}$ ).

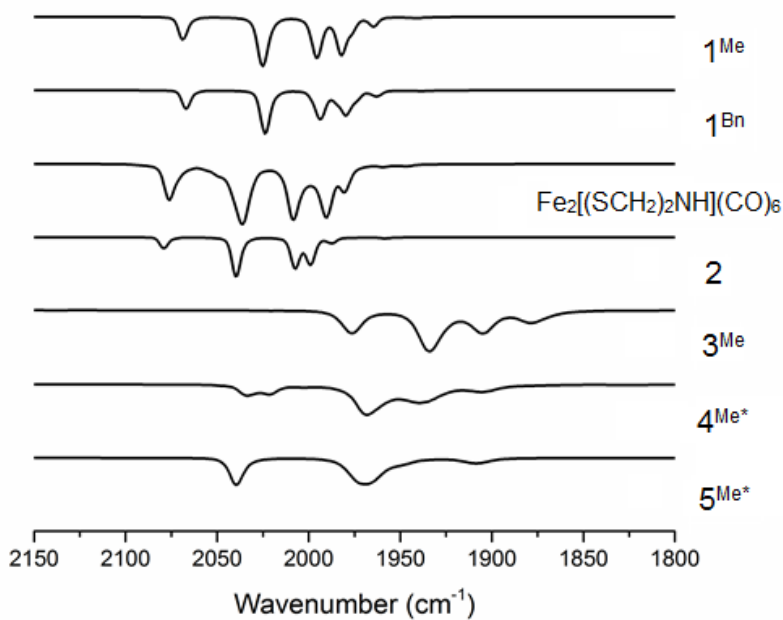

**Figure S2.** IR spectra of compounds discussed in this report recorded in hexanes.\* Recorded on  $\text{CH}_2\text{Cl}_2$  solutions.

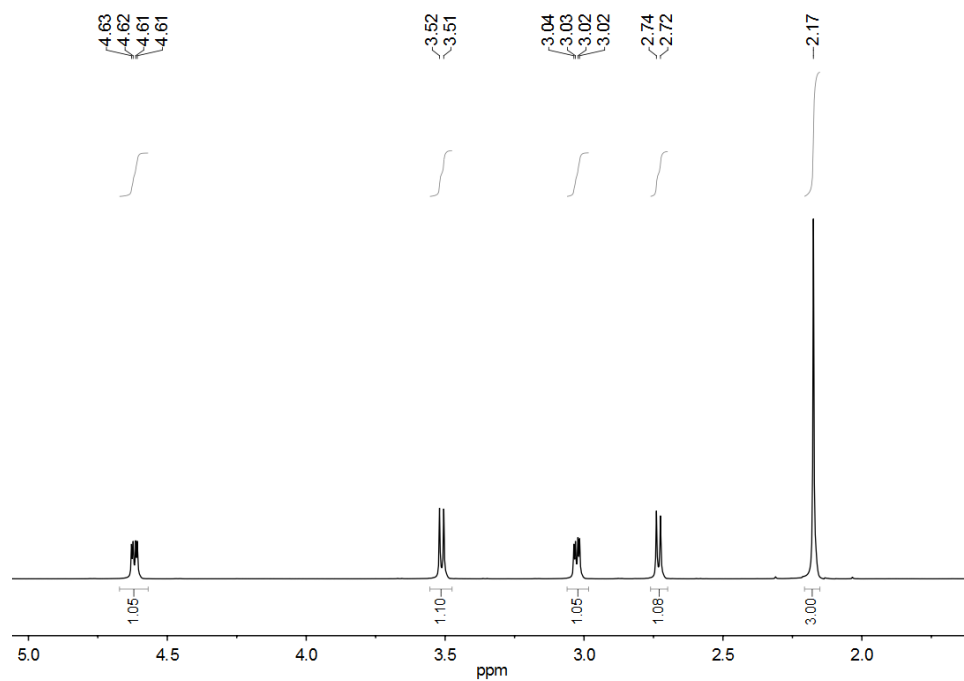

**Figure S3.**  $^1\text{H}$  NMR spectrum (500 MHz,  $\text{CD}_2\text{Cl}_2$  solution) of  $\mathbf{1}^{\text{Me}}$ .  
 Assignments:  $\delta$  2.17 (s, 3H,  $\text{NCH}_3$ ), 2.73 (d, 1H,  $\text{NCH}_2\text{Fe}$ ), 3.03 (dd, 1H,  $\text{NCH}_2\text{Fe}$ ), 3.52 (d, 1H,  $\text{NCH}_2\text{S}$ ), 4.63 (dd, 1H,  $\text{NCH}_2\text{S}$ ).

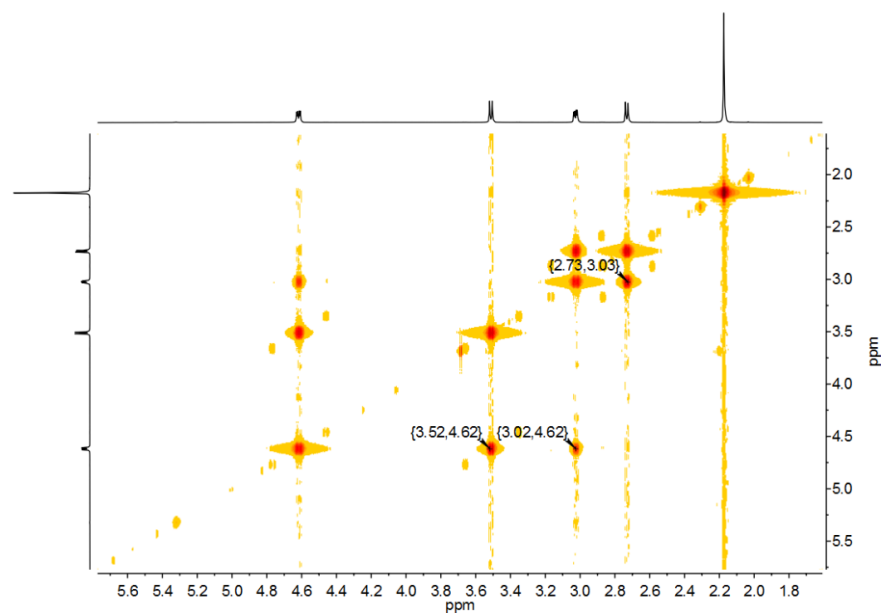

**Figure S4.**  $^1\text{H}$ - $^1\text{H}$  correlation (COSY) NMR spectrum (500 MHz,  $\text{CD}_2\text{Cl}_2$  solution) of  $\mathbf{1}^{\text{Me}}$ .

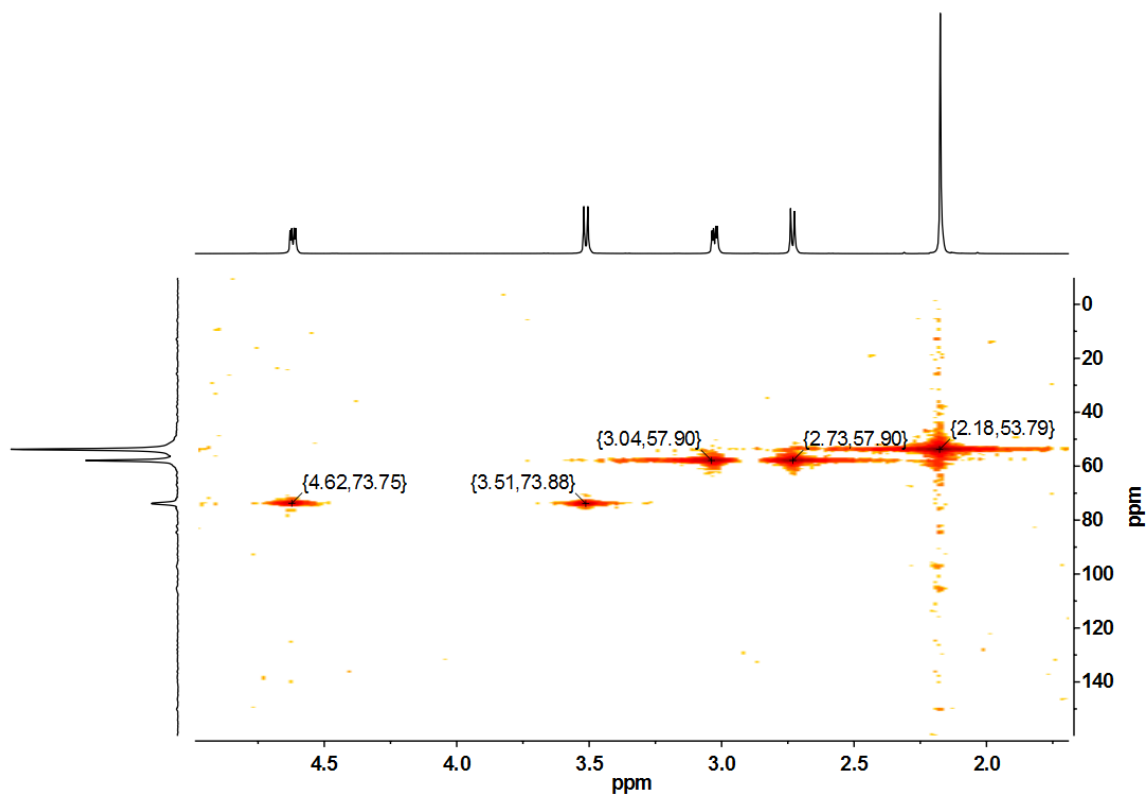

**Figure S5.**  $^1\text{H}$ - $^{13}\text{C}$  heteronuclear single-quantum correlation (HSQC) NMR spectrum (500 MHz,  $\text{CD}_2\text{Cl}_2$  solution) of  $\mathbf{1}^{\text{Me}}$ .

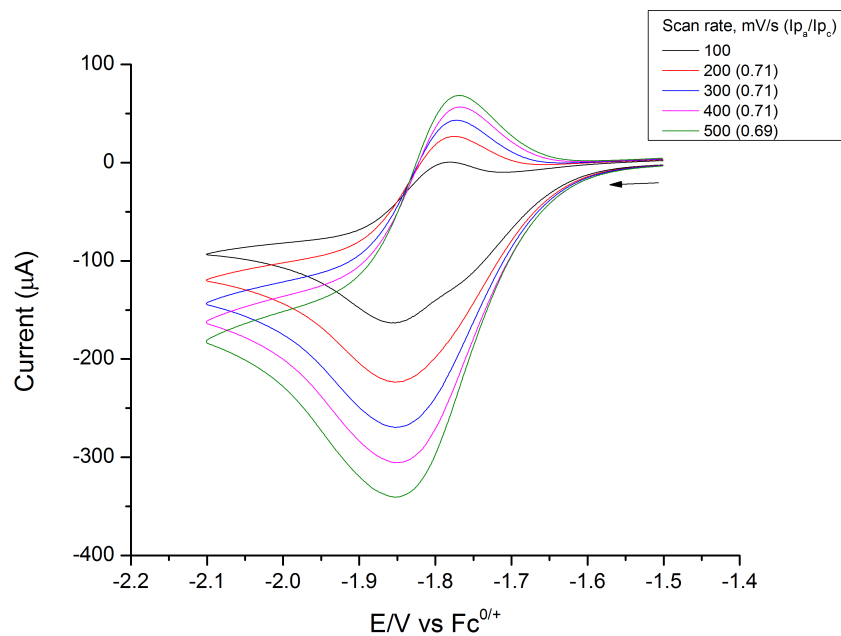

**Figure S6.** Cyclic Voltammogram of  $\mathbf{1}^{\text{Me}}$  at various scan rates. *Conditions:* 3mM solution in  $\text{CH}_2\text{Cl}_2$ , 0.1M  $\text{NBu}_4\text{PF}_6$  electrolyte; glassy carbon working electrode, Ag/AgCl reference electrode, and Pt wire counter electrode.

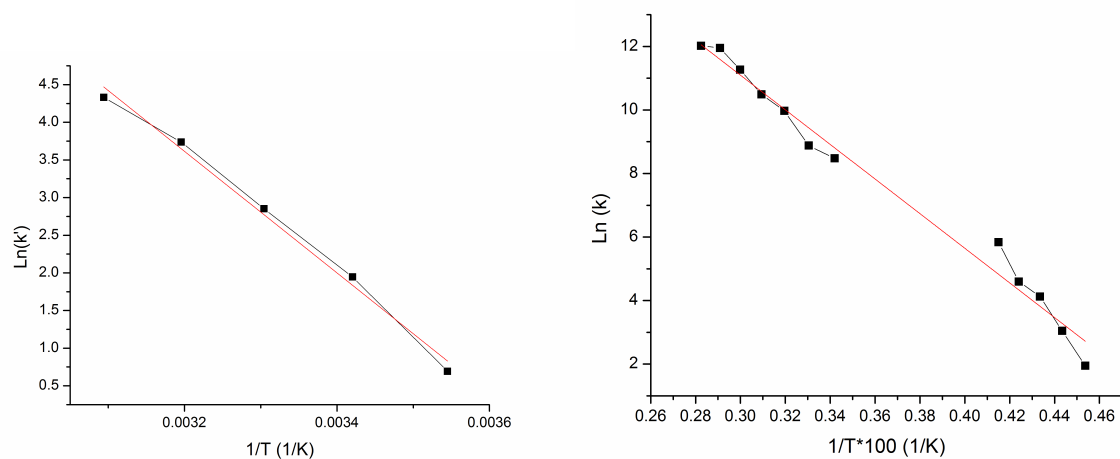

**Figure S7.** Arrhenius plots for the dynamic processes of  $1^{\text{Me}}$  described by  $k_{\text{rigid}}$  (left), and  $k_{\text{non-rigid}}$  (right).

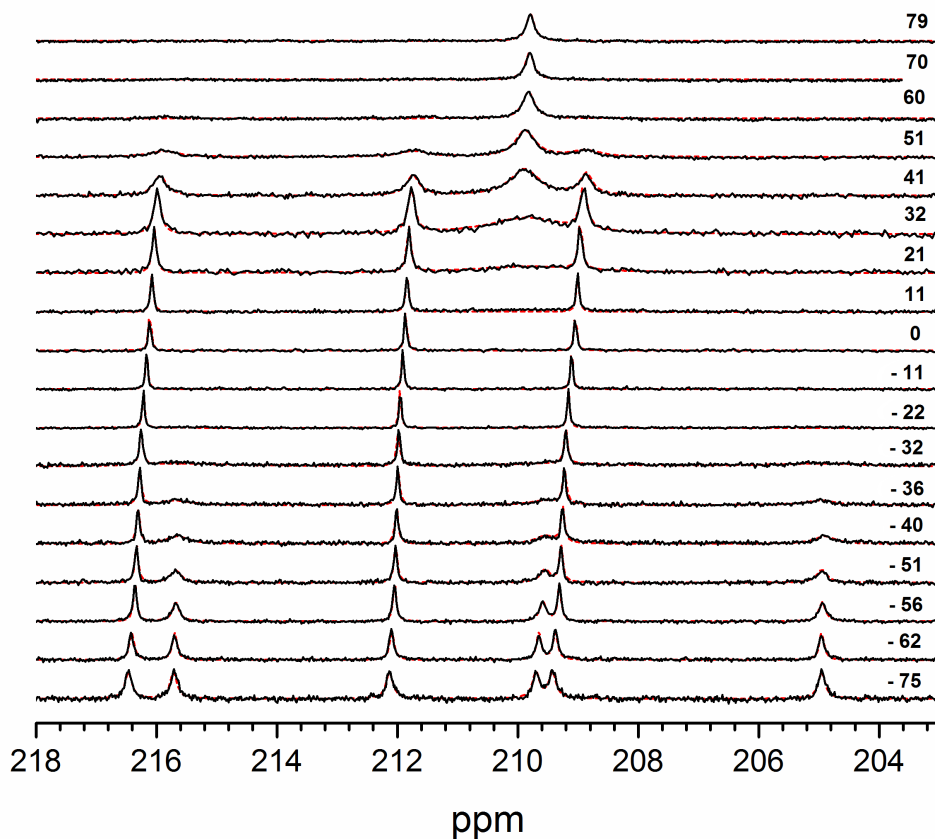

**Figure S8:**  $^{13}\text{C}$  NMR spectra (125.7 MHz,  $d_8$ -toluene solution) of compound  $1^{\text{Me}}$  at various temperatures (black), and NMR simulations (red) at various temperatures ( $^{\circ}\text{C}$ ). Simulations were generated using WIND-NMR software provided by Hans J. Reich, University of Wisconsin.

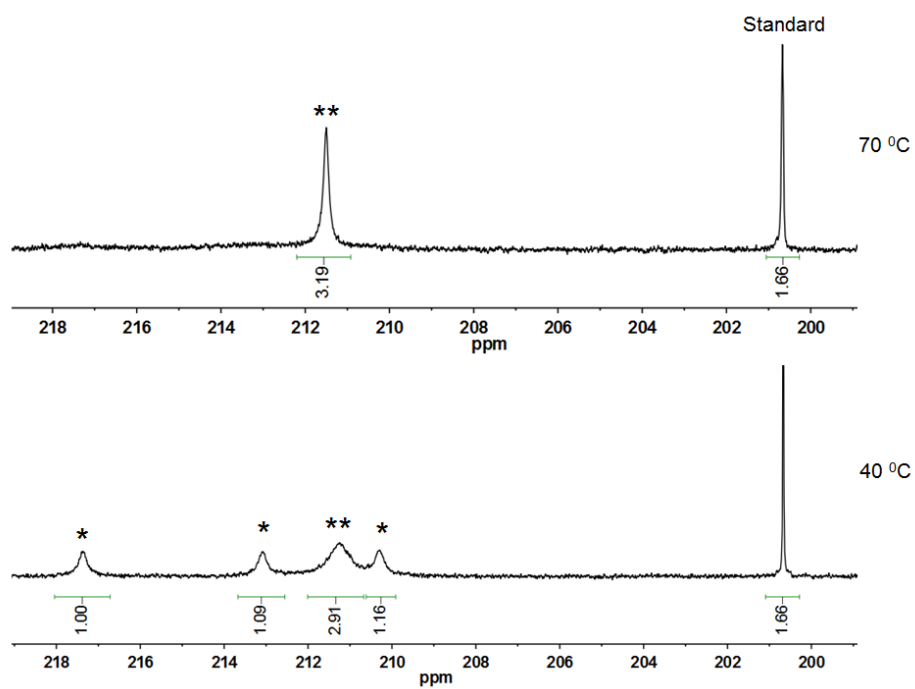

**Figure S9.**  $^{13}\text{C}$  NMR spectra (125.7 MHz,  $d_8$ -toluene solution) of  $1^{\text{Me}}$  at two temperatures with ethylacetoacetate as an internal standard. \*Rigid, \*\* Non-rigid.

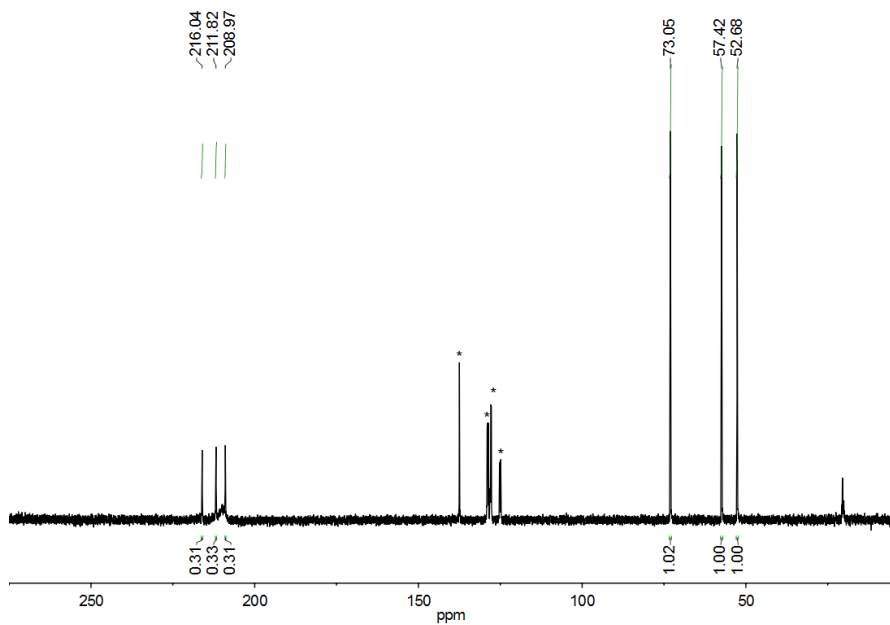

**Figure S10.**  $^{13}\text{C}\{^1\text{H}\}$  NMR spectrum (125.7 MHz,  $d_8$ -toluene solution) of  $1^{\text{Me}}$  at 20 °C. \* Residual solvent. Assignments:  $\delta$  52.7 (s, 1C,  $\text{NCH}_3$ ), 57.4 (s, 1C,  $\text{NCH}_2\text{Fe}$ ), 73.1 (s, 1C,  $\text{NCH}_2\text{S}$ ).

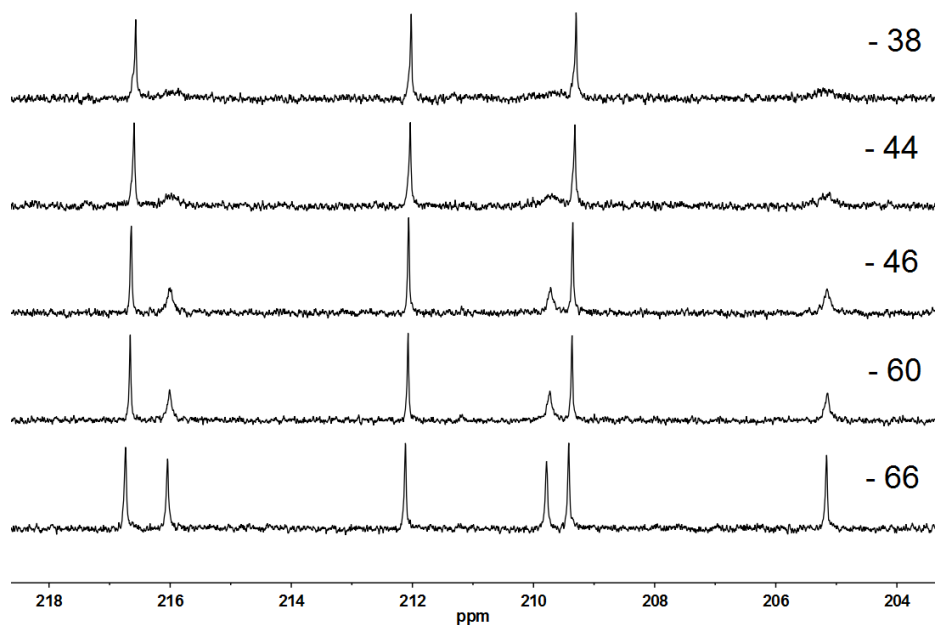

**Figure S11.**  $^{13}\text{C}\{^1\text{H}\}$  NMR spectra (126 MHz,  $\text{CD}_2\text{Cl}_2$  solution) of  $1^{\text{Me}}$  recorded at various temperatures.

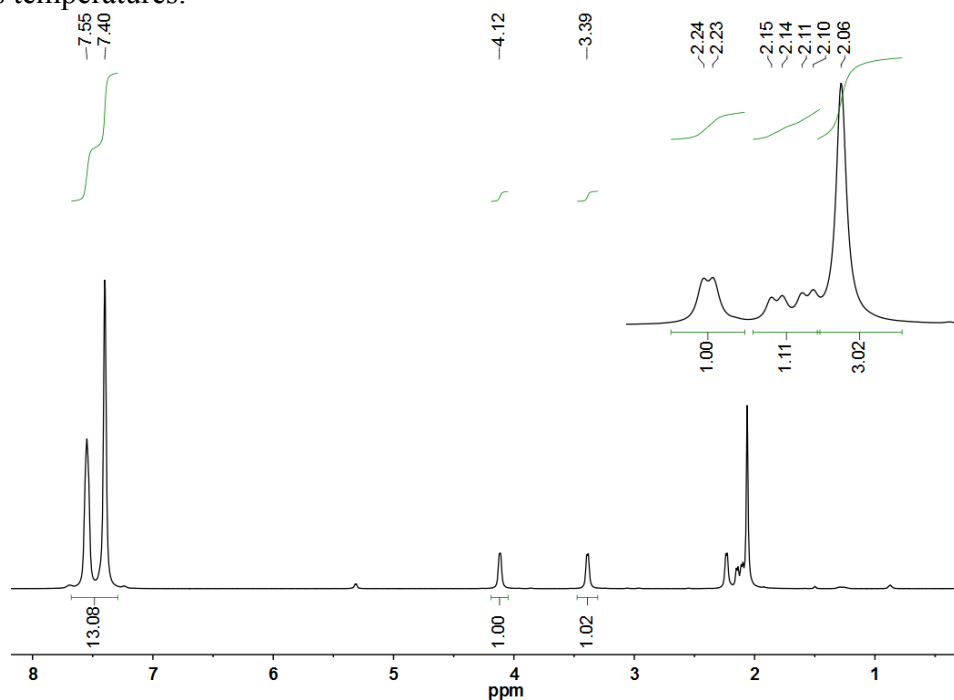

**Figure S12.**  $^1\text{H}$  NMR spectrum of crystals of  $3^{\text{Me}}$  (500 MHz,  $\text{CD}_2\text{Cl}_2$  solution).  
*Assignments:*  $\delta$  2.06 (s, 3H,  $\text{NCH}_3$ ), 2.12 (d, 1H,  $\text{NCH}_2\text{Fe}$ ), 2.23 (dd, 1H,  $\text{NCH}_2\text{Fe}$ ), 3.39 (d, 1H,  $\text{NCH}_2\text{S}$ ), 4.12 (dd, 1H,  $\text{NCH}_2\text{S}$ ), 7.40-7.55 (2s, 15H,  $\text{P}(\text{C}_6\text{H}_5)_3$ ).

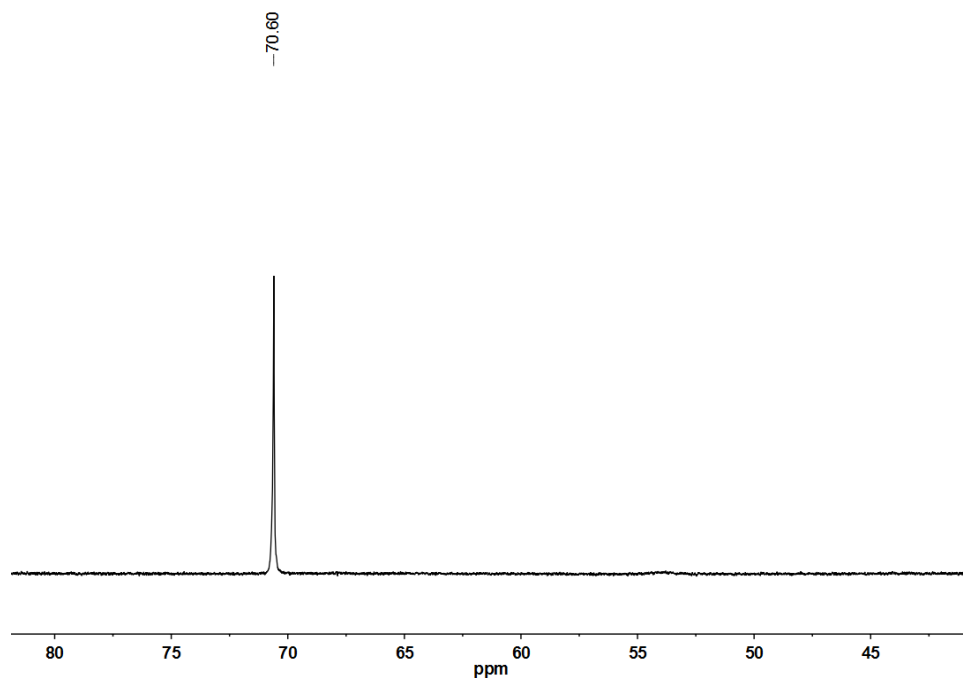

**Figure S13.**  $^{31}\text{P}\{^1\text{H}\}$  NMR spectrum of crystals of  $\mathbf{3}^{\text{Me}}$  (202 MHz,  $\text{CD}_2\text{Cl}_2$  solution).  
*Assignments:*  $\delta$  70.60 ( $\text{PPh}_3$ ).

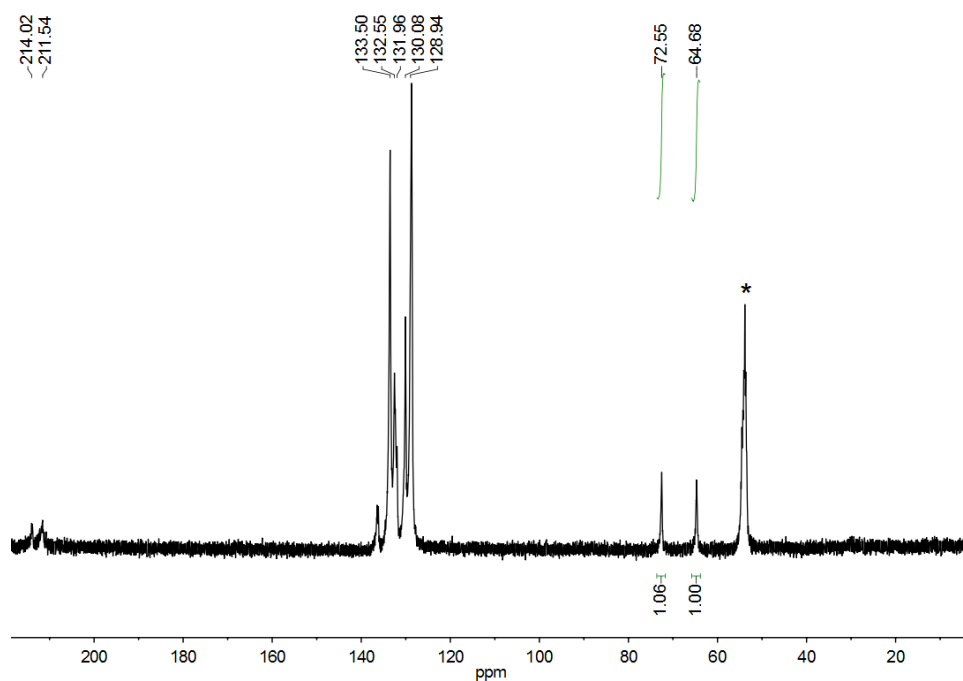

**Figure S14.**  $^{13}\text{C}$  NMR spectrum (125.7 MHz,  $\text{CD}_2\text{Cl}_2$  solution) of  $\mathbf{3}^{\text{Me}}$  at 20 °C. Inset: \* Residual solvent. *Assignments:*  $\delta$  64.7 (s, 1C,  $\text{NCH}_2\text{Fe}$ ), 72.6 (s, 1C,  $\text{NCH}_2\text{S}$ ), 129-134 ( $\text{P}(\text{C}_6\text{H}_5)_3$ ).



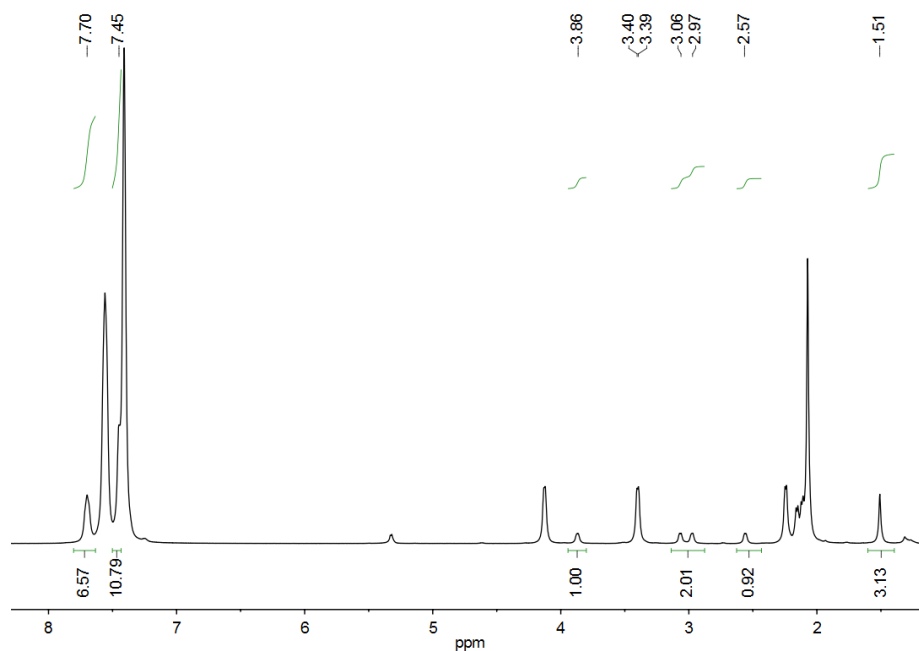

**Figure S15.**  $^1\text{H}$  NMR spectrum of crystals of  $3^{\text{Me}}$  (500 MHz,  $\text{CD}_2\text{Cl}_2$  solution) highlighting minor isomer that forms after 24 h. Assignments:  $\delta$  1.51 (s, 3H,  $\text{NCH}_3$ ), 2.57 (d, 1H,  $\text{NCH}_2\text{Fe}$ ), 2.97 (d, 1H,  $\text{NCH}_2\text{Fe}$ ), 3.06 (d, 1H,  $\text{NCH}_2\text{S}$ ), 3.86 (d, 1H,  $\text{NCH}_2\text{S}$ ), 7.45-7.70 (2s, 15H,  $\text{P}(\text{C}_6\text{H}_5)_3$ ).

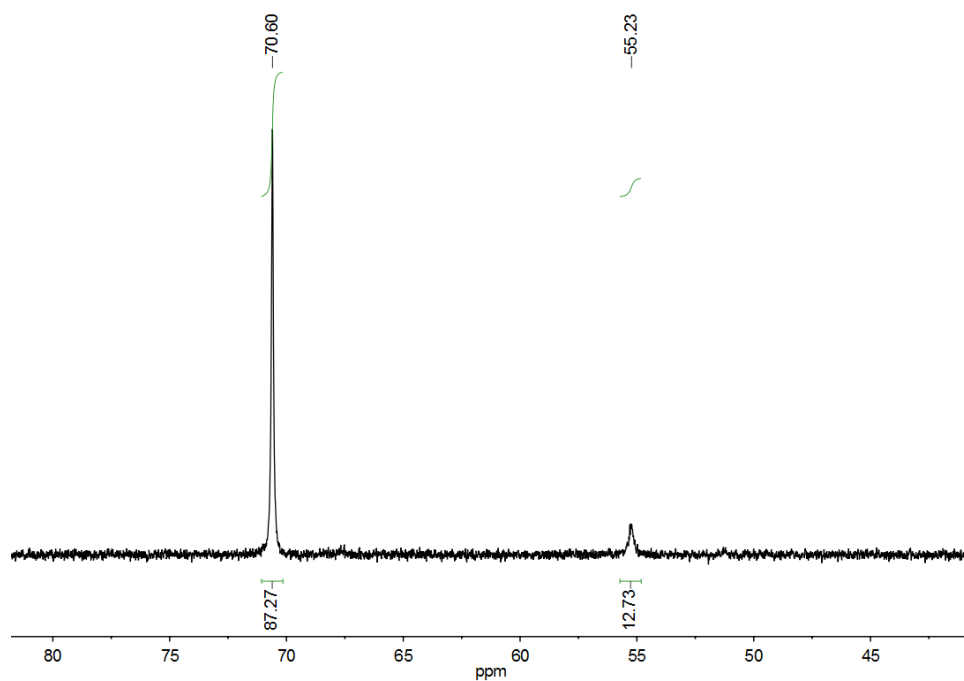

**Figure S16.**  $^{31}\text{P}\{^1\text{H}\}$  NMR spectrum of crystals of  $3^{\text{Me}}$  (202.3 MHz,  $\text{CD}_2\text{Cl}_2$  solution) after 24 h.

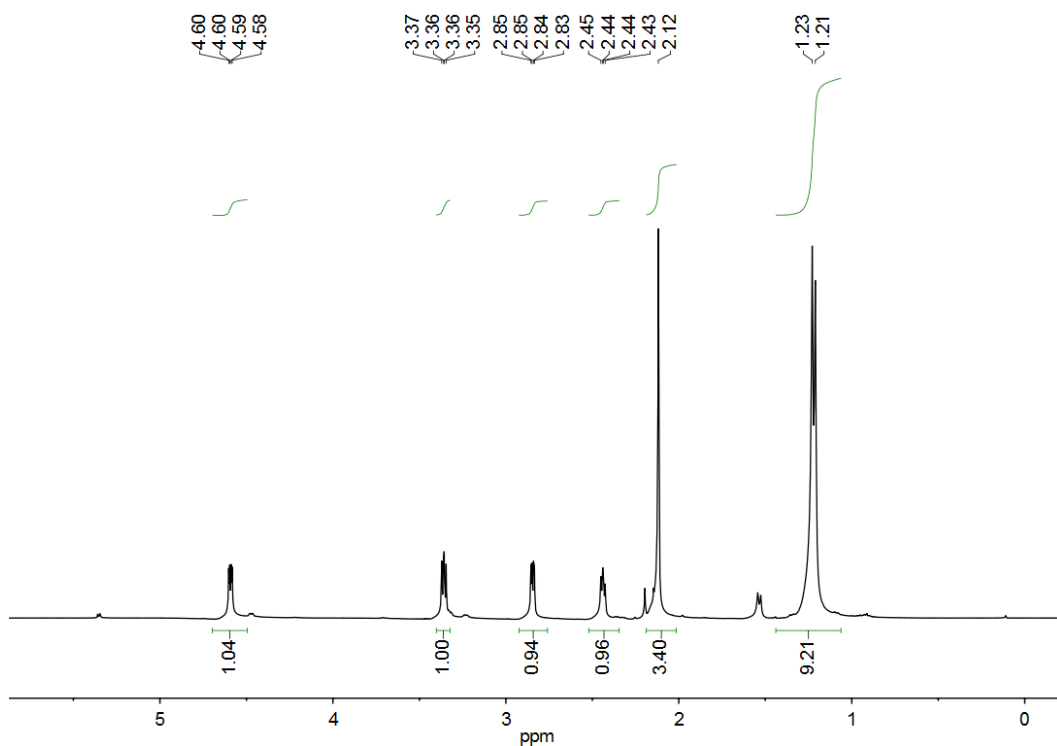

**Figure S17.**  $^1\text{H}$  NMR spectrum (500 MHz,  $\text{CD}_2\text{Cl}_2$  solution) of  $4^{\text{Me}}$ .  
*Assignments:*  $\delta$ 1.21 (d, 9H,  $\text{P}(\text{CH}_3)_3$ ), 2.12 (2, 3H,  $\text{NCH}_3$ ), 2.44 (d, 1H,  $\text{NCH}_2\text{Fe}$ ), 2.85 (dd, 1H,  $\text{NCH}_2\text{Fe}$ ), 3.36 (d, 1H,  $\text{NCH}_2\text{S}$ ), 4.59 (dd, 1H,  $\text{NCH}_2\text{S}$ ).

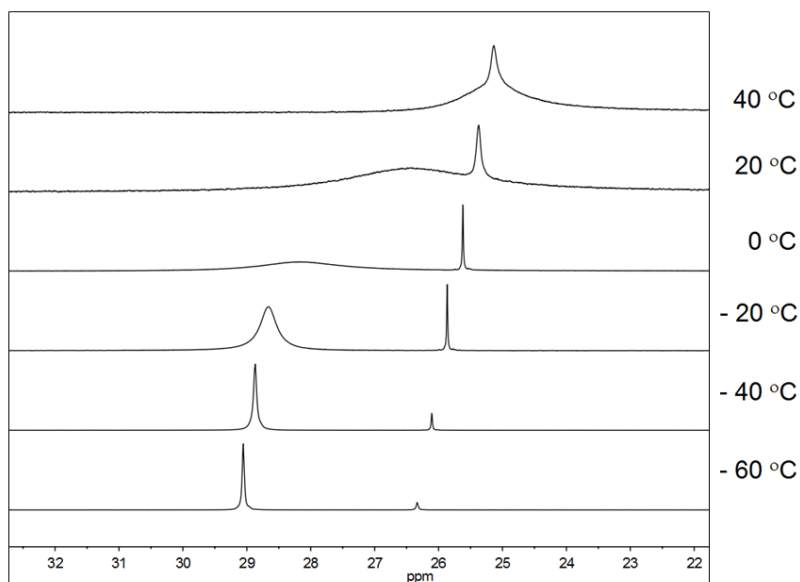

**Figure S18.**  $^{31}\text{P}\{^1\text{H}\}$  NMR spectrum (202.3 MHz,  $d_8$ -toluene solution) of  $4^{\text{Me}}$  at various temperatures.

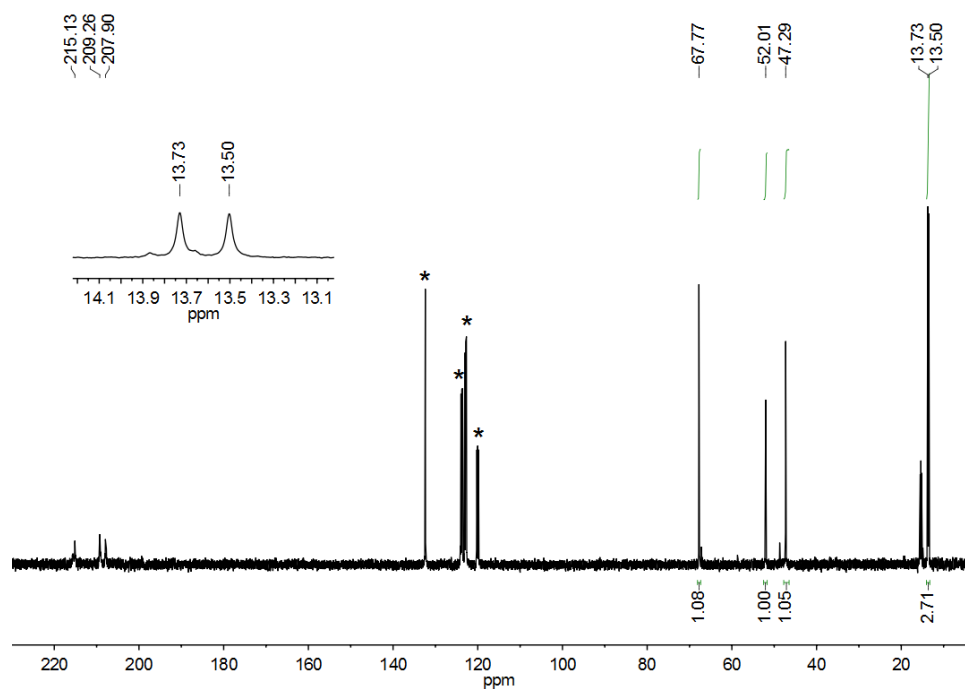

**Figure S19.**  $^{13}\text{C}$  NMR spectrum (125.7 MHz,  $d_8$ -toluene solution) of  $4^{\text{Me}}$  at 20 °C. \* Residual solvent. *Assignments:*  $\delta$  13.5 (d, 1C,  $\text{P}(\text{CH}_3)_3$ ,  $J_{\text{PC}} = 28.9$  Hz), 47.3 (s, 1C,  $\text{NCH}_3$ ), 52.0, (s, 1C,  $\text{NCH}_2\text{Fe}$ ), 67.8 (s, 1C,  $\text{NCH}_2\text{S}$ ), 208-215 (3s, 3 C,  $\text{Fe}(\text{CO})_3$ ).

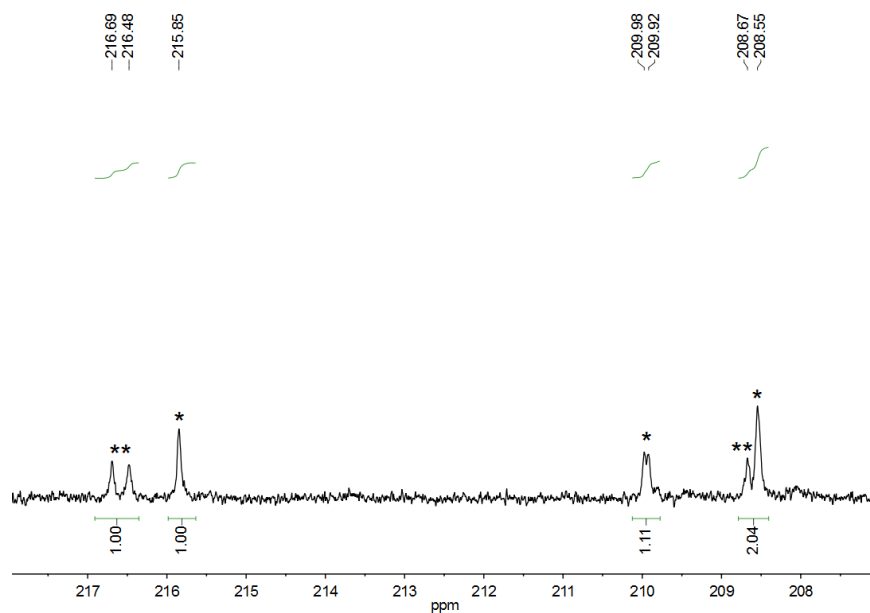

**Figure S20.**  $^{13}\text{C}$  NMR spectrum (125.7 MHz,  $d_8$ -toluene solution) of  $4^{\text{Me}}$  at -60 °C. \* Rigid iron center (3C,  $\text{Fe}^{\text{CH}_2}(\text{CO})_3$ ) \*\* non-rigid iron center (2C,  $\text{Fe}^{\text{NMe}}(\text{CO})_2\text{PMe}_3$ ).

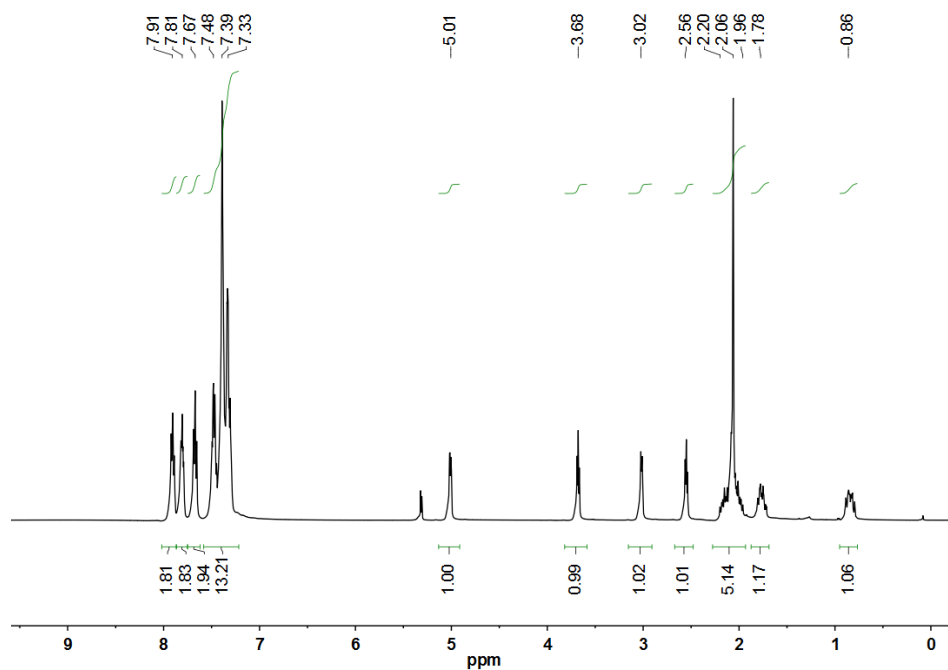

**Figure S21.**  $^1\text{H}$  NMR spectrum (500 MHz,  $\text{CD}_2\text{Cl}_2$  solution) of  $5^{\text{Me}}$ .  
*Assignments:*  $\delta$ 2.06 (s, 3H,  $\text{NCH}_3$ ), 2.56 (dd, 1H,  $\text{NCH}_2\text{Fe}$ ), 3.02 (d, 1H,  $\text{NCH}_2\text{Fe}$ ), 3.68 (dd, 1H,  $\text{NCH}_2\text{S}$ ), 5.01 (d, 1H,  $\text{NCH}_2\text{S}$ ), 0.9-2.10 (m, 10H,  $\text{PCH}_2\text{CH}_2\text{P}$ ), 7.37-7.95 (m, 20H,  $\text{P}(\text{C}_6\text{H}_5)_2$ ).

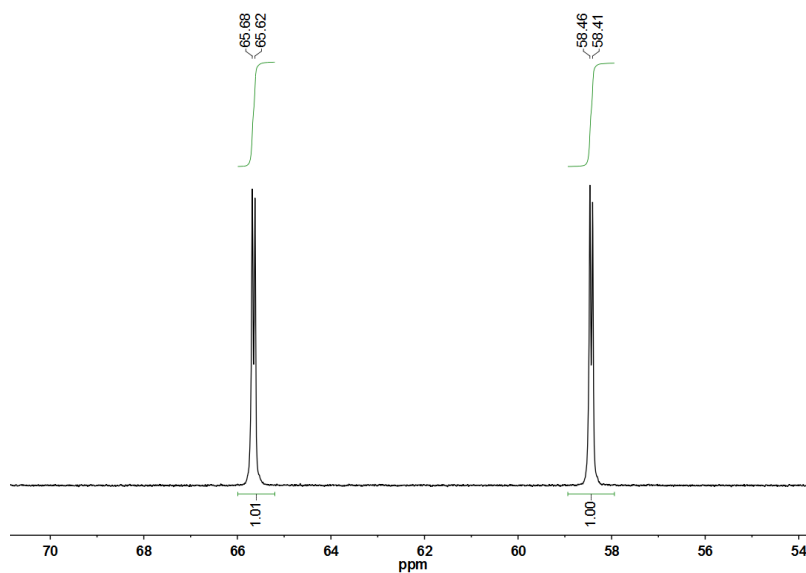

**Figure S22.**  $^{31}\text{P}\{^1\text{H}\}$  NMR spectrum (202.3 MHz,  $\text{CD}_2\text{Cl}_2$  solution) of  $5^{\text{Me}}$ .  $J_{\text{PP}} = 11.8$  Hz.

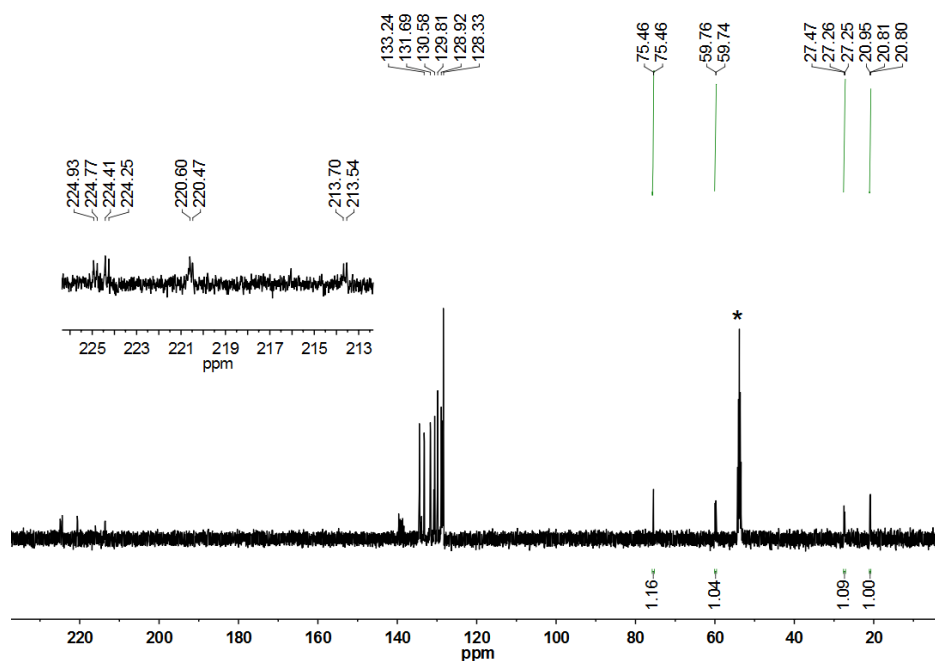

**Figure 3.**  $^{13}\text{C}$  NMR spectrum (125.7 MHz,  $\text{CD}_2\text{Cl}_2$  solution) of  $5^{\text{Me}}$  at 20 °C. \*Residual solvent. *Assignments:*  $\delta$ 20.8 (t, 1C,  $\text{PCH}_2\text{CH}_2\text{P}$ ), 27.3 (t, 1C,  $\text{PCH}_2\text{CH}_2\text{P}$ ), 560 (d, 1C,  $\text{NCH}_2\text{Fe}$ ), 75.5 (d, 1C,  $\text{NCH}_2\text{S}$ ), 128.33-133.24 (m, 24 C,  $\text{P}(\text{C}_6\text{H}_5)_2$ ), 214-225 (4d, 4C,  $\text{Fe}(\text{CO})_2$ ).
